# Supplementary material
Source: Springer Nature journal article supplement (https://www.springermedizin.de/resource/supplementary/13023_2012_487_MOESM9_ESM.pdf/9642328)

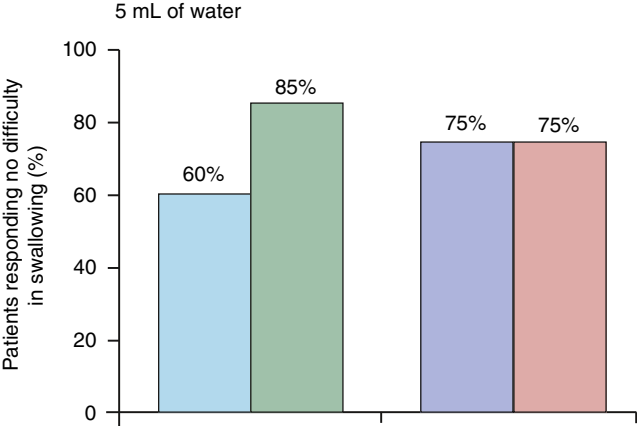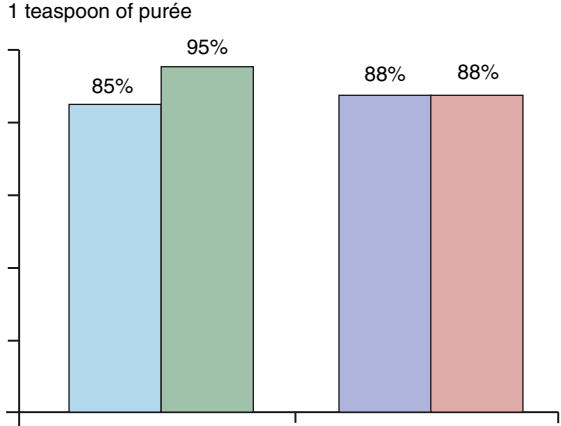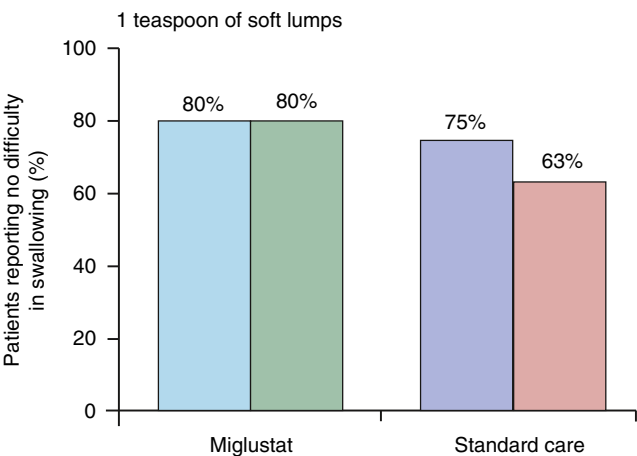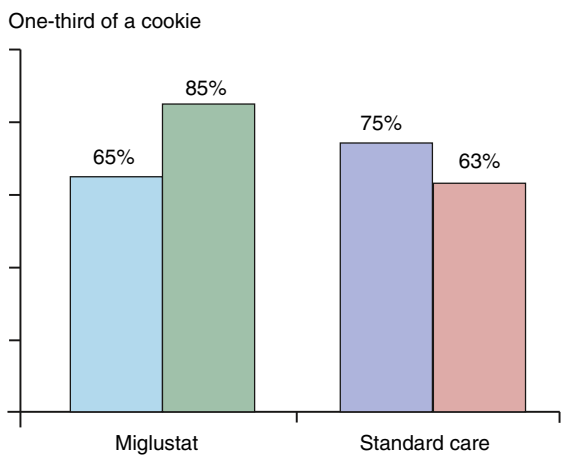

Miglustat, baseline   Miglustat, last visit   Standard care, baseline   Standard care, last visit

Supplement: MOESM9 [file 9642328]
